# Supplementary material for: Research progress of spontaneous ruptured hepatocellular carcinoma: Systematic review and meta-analysis
Source: PubMed Central journal article supplement (PMC9559597; doi:10.3389/fonc.2022.973857), 2022-09-29
Supplement: DataSheet_1.pdf [file DataSheet_1.pdf]

## *Supplementary Material*

### **Supplementary Figures**

**Supplementary Figure 1:** Schematic illustration of the literature search and study-selection criteria.

**Supplementary Figure 2:** (a) Forest plot for operation time showed no significant difference between ER and SH. (b) Forest plot for blood loss showed that the ER group lost more blood than the SH group. (c) Forest plot for the need for blood transfusion was also significantly higher in the ER group. Forest plot for (d) the complication rates, (e) the postoperative liver failure and (f) the mortality rates of the ER and SH group were no significant difference.

**Supplementary Figure 3:** Forest plots for showed that the difference in (a) total recurrence rate and (b) peritoneal metastases between ER and SH group was not statistically significant.

**Supplementary Figure 4:** Forest plots for the (a) 1-, (b) 2-, and (c) 3-year OS rates were not significantly different between the ER and SH groups. (d) Forest plots for the 5-year OS of the ER group was significantly lower than that of the SH group.

**Supplementary Figure 5:** Forest plots for the (a) 1-, (b) 2-, (c) 3-year and (d) 5-year DFS rates were not significantly different between the ER and SH groups.

**Supplementary Figure 6:** Begg's test for does not indicate any evidence of publication bias.

Tested by (a) Begg's rank-related test ( $P = 0.806$ ) and (b) Egger linear regression method ( $P = 0.067$ ) showed no publication bias in the studies included in this meta-analysis.

## Supplementary Tables

Supplementary Table 1 Summary of characteristics of included studies

| Study        | No. patients |     | Childs-Pugh A<br>[n(%)] |          | Tumor size [cm, ( $\bar{x}\pm s$ )<br>or $M(Q_1, Q_3)$ ] |                | Shock [n(%)] |          | Liver cirrhosis<br>[n(%)] |          |
|--------------|--------------|-----|-------------------------|----------|----------------------------------------------------------|----------------|--------------|----------|---------------------------|----------|
|              | ER           | SH  | ER                      | SH       | ER                                                       | SH             | ER           | SH       | ER                        | SH       |
| Zhou C       | 40           | 20  | 31(77.5)                | 11(55.0) | 7.1 $\pm$ 3.9                                            | 7.3 $\pm$ 2.3  | 15(37.5)     | 10(50)   | 31(77.5)                  | 15(75.0) |
| Wu JJ        | 30           | 100 | 17(56.7)                | 90(90.0) | 6.5(4.8~8.5)                                             | 8.0(5.3~10)    | 15(50.0)     | 8(8.0)   | 15(50.0)                  | 75(75.0) |
| Zhong F      | 79           | 27  | 53(67.1)                | 15(55.6) | 8.8 $\pm$ 2.3                                            | 9.0 $\pm$ 1.4  | NR           | NR       | 66(83.5)                  | 20(74.1) |
| Yang H       | 17           | 11  | 10(58.8)                | 8(72.7)  | NR                                                       | NR             | NR           | NR       | NR                        | NR       |
| Ren A        | 17           | 27  | NR                      | NR       | 8.6 $\pm$ 3.4                                            | 10.4 $\pm$ 4.9 | NR           | NR       | 8(47.1)                   | 14(51.9) |
| Ou D         | 73           | 58  | 61(83.6)                | 47(81.0) | 10(4~23)                                                 | 11(6~25)       | 37(50.7)     | 25(43.1) | 48(65.8)                  | 37(63.8) |
| Hsueh KC     | 19           | 18  | NR                      | NR       | NR                                                       | NR             | NR           | NR       | NR                        | NR       |
| Buczowski AK | 10           | 10  | NR                      | NR       | 7 $\pm$ 4                                                | 7 $\pm$ 3      | NR           | NR       | 7(70.0)                   | 5(50.0)  |

ER: emergency resection; SH: staged hepatectomy; NR: no report

Supplementary Table 2 Risk of bias using the modified Newcastle-Ottawa Scale

| Study        | Selection      |                                      |                                          | Comparability                  |                           | Outcome               |           |                       | Score |
|--------------|----------------|--------------------------------------|------------------------------------------|--------------------------------|---------------------------|-----------------------|-----------|-----------------------|-------|
|              | Case selection | Representativeness of exposed cohort | Representativeness of non-exposed cohort | Comparability of baseline data | Comparability of ER vs SH | Assessment of outcome | Follow-up | Adequacy of follow-up |       |
| Zhou C       | 1              | 1                                    | 1                                        | 1                              | 2                         | 1                     | 1         | 1                     | 9     |
| Wu JJ        | 1              | 1                                    | 0                                        | 1                              | 2                         | 1                     | 1         | 0                     | 7     |
| Zhong F      | 1              | 1                                    | 1                                        | 1                              | 2                         | 1                     | 0         | 1                     | 8     |
| Yang H       | 1              | 1                                    | 1                                        | 1                              | 1                         | 1                     | 0         | 0                     | 6     |
| Ren A        | 1              | 1                                    | 0                                        | 1                              | 2                         | 1                     | 1         | 0                     | 7     |
| Ou D         | 1              | 1                                    | 1                                        | 1                              | 2                         | 1                     | 1         | 1                     | 9     |
| Hsueh KC     | 1              | 1                                    | 1                                        | 0                              | 2                         | 1                     | 0         | 1                     | 7     |
| Buczowski AK | 1              | 1                                    | 0                                        | 1                              | 2                         | 1                     | 0         | 1                     | 7     |
